# Supplementary material
Source: Springer Nature journal article supplement (https://www.springermedizin.de/resource/supplementary/12889_2012_4732_MOESM4_ESM.pdf/9493482)

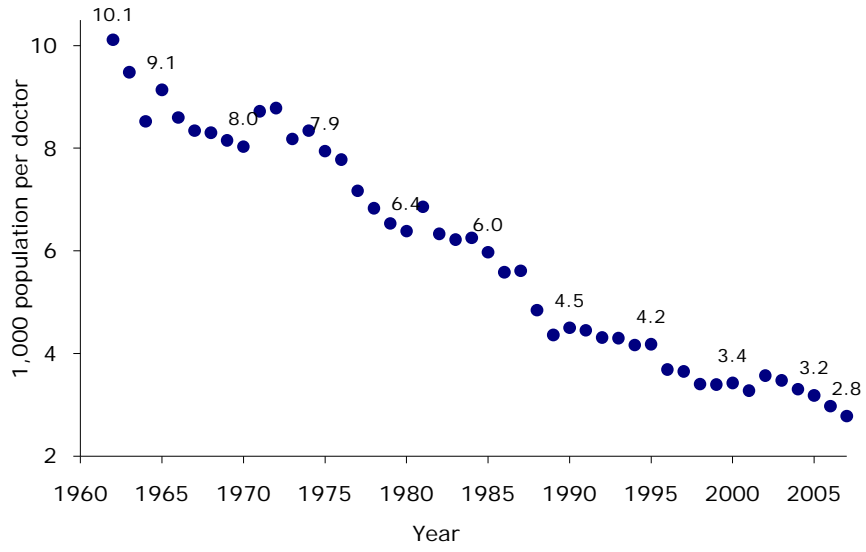

**Figure 4** 1,000 Population per doctor, 1960-2007

Supplement: MOESM4 [file 9493482]
